# Supplementary material
Source: Springer Nature journal article supplement (https://www.springermedizin.de/resource/supplementary/13019_2013_1560_MOESM4_ESM.pdf/9640652)

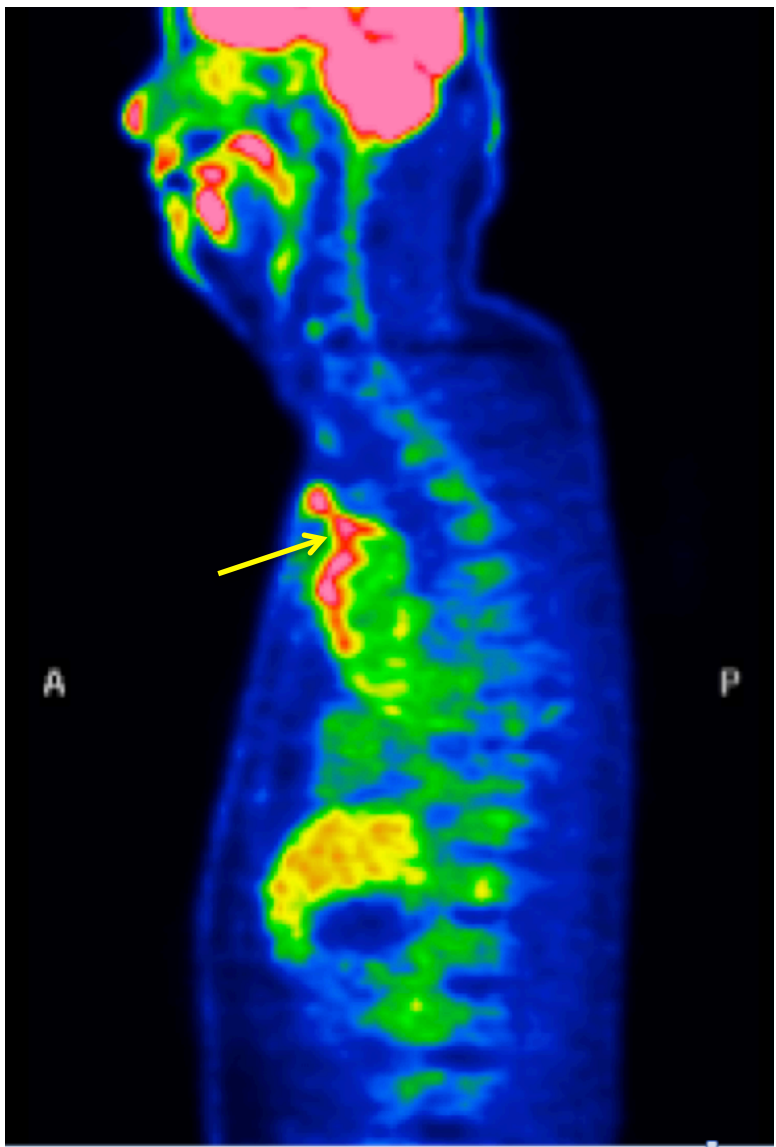

Supplement: MOESM4 [file 9640652]
